# Supplementary material for: Integrated production of furfural and levulinic acid from corncob in a one-pot batch reaction incorporating distillation using step temperature profiling
Source: Royal Society of Chemistry journal article supplement (doi:10.1039/c7ra08818c), 2017-01-01
Supplement: c7ra08818c1.pdf [file c7ra08818c1.pdf]

## ELECTRONIC SUPPLEMENTAL INFORMATION

# Integrated Production of Furfural and Levulinic Acid from Corncob in One-pot Batch Reaction Incorporating Distillation Using Step Temperature Profiling

Hairui Ji <sup>a</sup>, J.Y. Zhu <sup>b\*</sup>, Roland Gleisner <sup>b</sup>

<sup>a</sup> College of Life Science and Technology, Beijing University of Chemical  
Technology, Beijing, China

<sup>b</sup> USDA Forest Service, Forest Products Laboratory, Madison, WI, USA

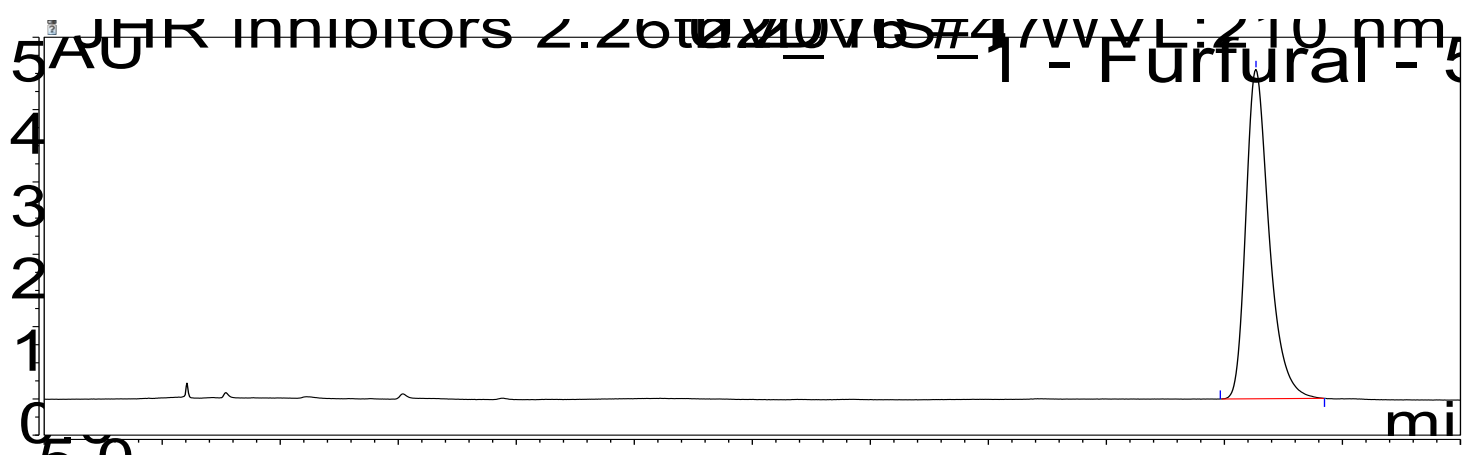

Fig. S1. Chromatogram of furfural solution isolated from hydrolyses.

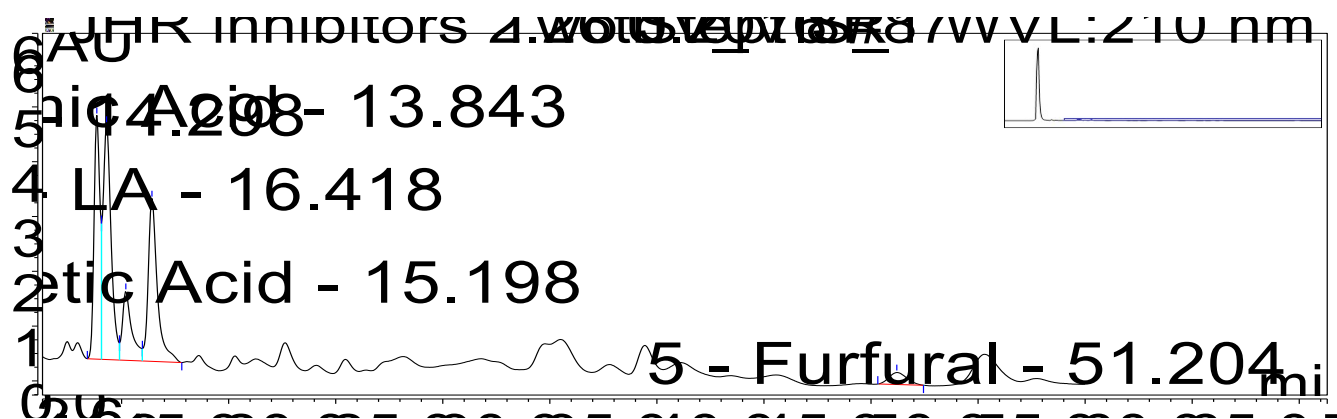

Fig. S2. Chromatogram of LA solution from hydrolyses.
